# Supplementary material
Source: MDPI journal article supplement (https://www.mdpi.com/2297-8739/9/1/13)
Supplement: s1 [file s1]

# Detection of *Escherichia coli* by Combining an Affinity-Based Method with Atmospheric Pressure Ionization Mass Spectrometry

Juli Novita Sari <sup>1,2</sup>, Karthikeyan Kandasamy <sup>1,2</sup> and Yu-Chie Chen <sup>1,2,\*</sup>

## Additional Experimental Details

### 1. Materials and reagents

Fused silica capillary (inner diameter: ~50  $\mu\text{m}$ , outer diameter: ~360  $\mu\text{m}$ ) were purchased from Polymicro Technologies (Phoenix, AZ, USA). Ethanol was purchased from Echo (Miaoli, Taiwan). Luria-Bertani (LB) broth and tryptic soya broth (TSB) were purchased from Becton Dickinson (Franklin Lakes, NJ, USA). Yeast extract was purchased from Alpha Bioscience (Baltimore, MD, USA), whereas agarose was purchased from Amresco (Solon, OH, USA). Hydrofluoric acid (HF) was obtained from Merck (Darmstadt, Germany). Hydrogen peroxide was obtained from Showa (Japan). 3,3',5,5'-tetramethylbenzidine (TMB), potassium chloride, sodium phosphate dibasic heptahydrate, potassium phosphate monobasic, and horseradish peroxidase (HRP) were purchased from Sigma-Aldrich (St. Louis, MO, USA). Ammonium acetate was purchased from Fluka (Seelze, Germany). *Staphylococcus aureus*, *Acinetobacter baumannii*, *Enterococcus faecalis*, *Pseudomonas aeruginosa*, and *Klebsiella pneumonia* were collected from the patients in the Tzu-Chi General Hospital (Hualien, Taiwan) and kindly provided by Prof. P.-J. Tsai (NCKU, Taiwan). *Escherichia coli* J96, *Escherichia coli* BOS117, *Escherichia coli* HB101, and *Escherichia coli* JM109, *Escherichia coli* UTI no. 37 were kind gifts from Dr. James Johnson (Minneapolis Veterans Affairs Medical Center and University of Minnesota, Department of Medicine). *Escherichia coli* O157:H7 and *Bacillus cereus* were purchased from the BioResource Collection and Research Center (Hsinchu, Taiwan).

### 2. Instrumentation

Either an amaZon SL mass spectrometer (Bruker Daltonics, Bremen, Germany) or a micrOTOF Q II mass spectrometer (Bruker Daltonics, Bremen, Germany) was used for C-API MS analysis. A CMOS camera (SG-210X) from Sage Vision (New Taipei City, Taiwan) was used for recording and taking images during MS analysis. Optical microscopic images were obtained from a Nikon Eclipse 80i microscope with a camera (DS-Ri1) (Tokyo, Japan). Gold coating on the surface of silica capillaries was conducted by using a 108-auto sputter coater from Ted Pella (Redding, CA, USA). Products obtained from the Maillard reaction were purified by high-performance liquid chromatography (HPLC) equipped with a LC-20AD pump and an SPD-M20A ultraviolet-visible detector from Shimadzu (Tokyo, Japan).

### 3. Preparation of tapered capillaries and gold-coated probes

A capillary was cut to ~4 cm using a ceramic glass cutter. The capillary was tapered by placing it vertically on a metal stand and clamping the upper and lower ends with two binder clips. The lower end of the capillary was hanged with a counterweight of 50 g. A butane torch was used to burn the capillary on the middle to have a narrow tip. The tapered end of the capillary was dipped to aqueous HF (24%, v/v) for 20 min followed by rinse with deionized water. The tapered capillary was thoroughly dried in the oven (60  $^{\circ}\text{C}$ ) to remove water prior to the experiment. The diameter of the tapered tip of the

**Citation:** Sari, J.N.; Kandasamy, K.; Chen, Y.-C. Detection of *Escherichia coli* by Combining an Affinity-Based Method with Contactless Atmospheric Pressure Ionization Mass Spectrometry. *Separations* **2022**, *9*, 13. <https://doi.org/10.3390/separations9010013>

Academic Editor: Federica Bianchi

Received: 1 December 2021

Accepted: 8 January 2022

Published: 12 January 2022

**Publisher's Note:** MDPI stays neutral with regard to jurisdictional claims in published maps and institutional affiliations.

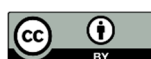

**Copyright:** © 2022 by the authors. Licensee MDPI, Basel, Switzerland. This article is an open access article distributed under the terms and conditions of the Creative Commons Attribution (CC BY) license (<https://creativecommons.org/licenses/by/4.0/>).

capillary was  $\sim 20\ \mu\text{m}$ . The as-prepared tapered capillary (length:  $\sim 2\ \text{cm}$ ) was used as the C-API ionization emitter. In addition, we also modified the tapered capillary as the bacterial trapping probe. That is, the surface of the capillary was flushed with nitrogen gas (30 psi ( $= 2.07 \times 10^5\ \text{Pa}$ )) to remove impurities. The tapered capillary was then put inside the chamber of the sputter coater for gold coating. The gold coating of the capillary was conducted by setting the current at 40 mA for 30 s followed by switching on argon gas for 40 s.

#### 4. Preparation of maltosylated-cysteine

$\beta$ -Maltose derivatized by cysteine was conducted through the Maillard reaction. Cysteine (12 mg) and  $\beta$ -maltose (102 mg) with a mole ratio of 1/3 were dissolved in deionized water (1 mL). The mixture was sonicated for 10 min followed by lyophilization. The lyophilized mixture was subjected to an oil bath at  $120\ ^\circ\text{C}$  for 30 min. Yellowish maltosylated-cysteine (MALCY) product was formed. The product was re-suspended in deionized water (1 mL). MALCY was purified by HPLC and confirmed by mass spectrometry. C18 column (dimensions:  $4.6 \times 150\ \text{mm}$ ; diameter of stationary particles:  $5\ \mu\text{m}$ ) was used in HPLC for separation. The composition of the mobile phase was methanol/ammonium bicarbonate (5 mM) (9:1, v/v) with a flow rate of  $0.6\ \text{mL min}^{-1}$ .

#### 5. Quantitative analysis of glucose unit on the probe by phenol-sulfuric acid method

Glucose standard samples ( $5\text{--}2836\ \mu\text{g mL}^{-1}$ , 0.2 mL) were prepared initially. Three gold-coated probes were put to each glucose standard sample. Phenol (53 M, 50  $\mu\text{L}$ ) was then added to glucose solution followed by sulfuric acid (18.4 M, 0.5 mL) in the ice bath, and the reaction stood for around 5 min. The color of the reaction solution slowly turned orange, and the reaction was cooled to room temperature for 10 min before examined by UV-Vis spectroscopy. Deionized water (0.2 mL) was added to the vial tube containing 3 MALCY-probe. Subsequently, phenol (53 M, 0.05 mL) was added to the solution followed by the addition of sulfuric acid (18.4 M, 0.5 mL) in an ice bath.

#### 6. Peroxidation reaction of TMB catalyzed by HRP

Peroxidation reaction of TMB catalyzed by HRP was first conducted. HRP ( $10^{-5}\ \text{M}$ , 5  $\mu\text{L}$ ) was prepared in ammonium acetate (pH 4.5, 45  $\mu\text{L}$ ). Hydrogen peroxide (100 mM, 45  $\mu\text{L}$ ) was added to the HRP solution (50  $\mu\text{L}$ ) followed by the addition of TMB (1 mg  $\text{mL}^{-1}$ , 5  $\mu\text{L}$ ). The mixture changed its color from colorless to blue, indicating the occurrence of TMB oxidation occurred.[1] The resultant sample was 100-fold diluted with ethanol/deionized water (2:1, v/v) prior to C-API-MS analysis.

#### 7. Preparation of artificial urine samples

Simulated urine samples were prepared by dissolving urea (121.3 mg), sodium chloride (50 mg), potassium chloride (30 mg), and sodium phosphate monobasic (32 mg) in deionized water (50 mL) [1]. The resultant solution was adjusted to pH 6.5. Creatinine (13.3 mg) and albumin from chicken egg (0.33 mg) were added to the artificial urine sample (50 mL) above to ensure similarity to human urine. The as-prepared artificial urine was 100-fold by PBS buffer (pH 7.5, 10 mM) prior to spiked with bacteria.

## 8. Additional Scheme

**Scheme 1.** Peroxidase reaction by using TMB as the substrate in the presence  $H_2O_2$  [2].

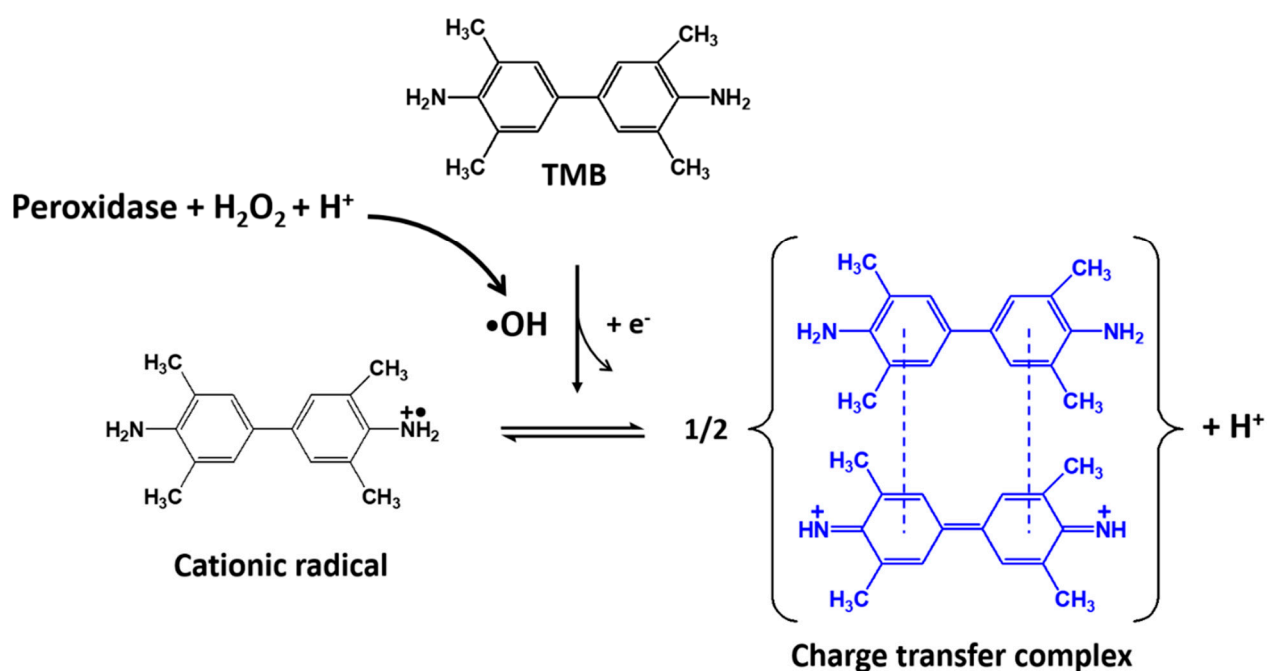

**Table S1.** Comparison of the current method with the existing methods for detection of *E. coli*.

| Method                                        | Sample type         | Limit of detection                   | Analysis time (Approx.) | References |
|-----------------------------------------------|---------------------|--------------------------------------|-------------------------|------------|
| Real time-based PCR                           | Ground beef         | $5 \times 10^2$ cfu ml <sup>-1</sup> | 5 h 10 min              | [3]        |
| ELISA based PCR                               | Milk                | $10^2$ cfu ml <sup>-1</sup>          | 5 h                     | [4]        |
| Paper-based ELISA                             | Buffer              | $10^4$ cfu ml <sup>-1</sup>          | 3 h                     | [5]        |
| Fluorescence-based bacteriophage assay        | Broth               | $10^2$ - $10^3$ cfu ml <sup>-1</sup> | 10 h                    | [6]        |
| Colorimetric                                  | Buffer              | $10^5$ cfu ml <sup>-1</sup>          | N/A                     | [7]        |
| Electrochemical immunoassay                   | Buffer              | $2 \times 10^2$ cfu ml <sup>-1</sup> | 3 h                     | [8]        |
| Surface modified gold-nanorods                | Broth               | $10^7$ cfu ml <sup>-1</sup>          | 8 h                     | [9]        |
| MALDI-TOF-MS                                  | Whole blood         | $8 \times 10^3$ cfu ml <sup>-1</sup> | 4 h                     | [10]       |
| Glycan-based affinity method combined with MS | Buffer/orange juice | $\sim 10^2$ cfu mL <sup>-1</sup>     | $\sim 2$ h              | This work  |

## 9. Additional Results and Discussion

**Figure S1A** shows the resultant LC chromatogram of the MALCY product. The fraction at 3.8–4.2 min was collected. **Figures S1B** and **S1C** show the electrospray ionization (ESI) mass spectra of the reaction product obtained before and after purification, respectively. Apparently, the ion peak at  $m/z$  446 derived from protonated MALCY dominated the mass spectrum after purification (**Figure S1C**).

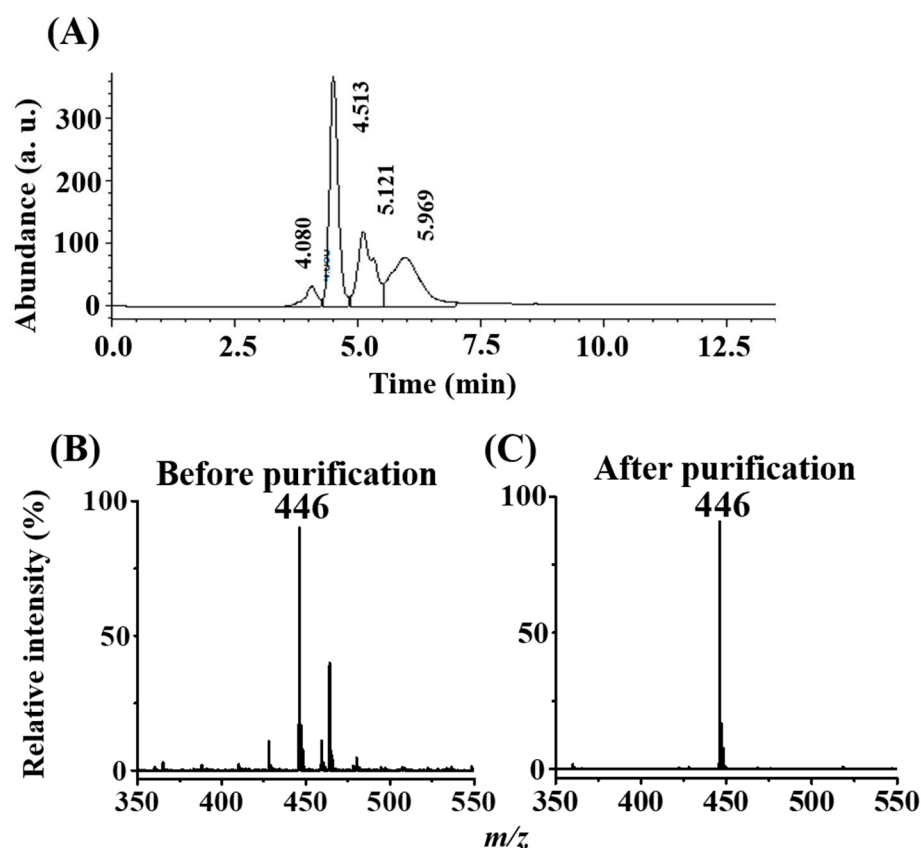

**Figure S1.** (A) LC chromatogram of the product derived from the Maillard reaction obtained by reacting cysteine and maltose with a mole ratio of 1/3 at 120 °C, monitored the wavelength at 210 nm by a photodiode array detector. ESI mass spectra of the reaction product obtained (B) before and (C) after purification by LC.

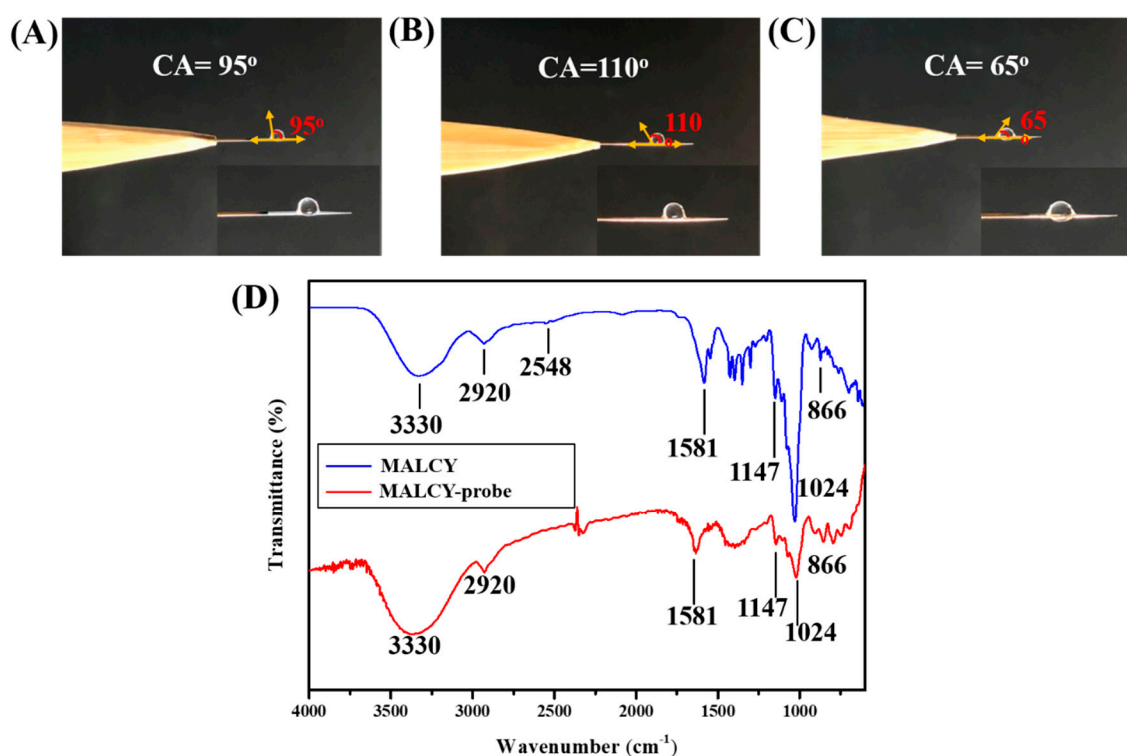

**Figure S2.** Photograph of the contact angles (CA) examined on the surfaces of (A) the unmodified capillary probe, (B) the gold-coated probe, and (C) the MALCY immobilized probe by depositing with a droplet of water ( $\sim 4 \mu\text{L}$ ). The inset photographs show the zoom-in pictures of the droplets on the as-prepared capillaries. (D) Infrared absorption spectra of the MALCY powder (blue line) and the MALCY-probe (red line). The characteristic bands derived from S-H at  $2548 \text{ cm}^{-1}$  no longer appeared in the spectrum of the MALCY-probe (red line). The band at  $866 \text{ cm}^{-1}$  were contributed by C-S stretching vibration mode. In addition, the characteristic band at  $1581 \text{ cm}^{-1}$  corresponded to asymmetric stretching C=O. The sharp peak at  $1024 \text{ cm}^{-1}$  was assigned to C-O single bond stretching of the C-O-C group. The band at  $\sim 3330 \text{ cm}^{-1}$  corresponded to the stretching mode of OH group, and the band at  $2920 \text{ cm}^{-1}$  was assigned to stretching vibrations of C-H group in the glucose unit. The absorption band at  $1147 \text{ cm}^{-1}$  was assigned to weak C-O stretching mode from glycosidic bond.

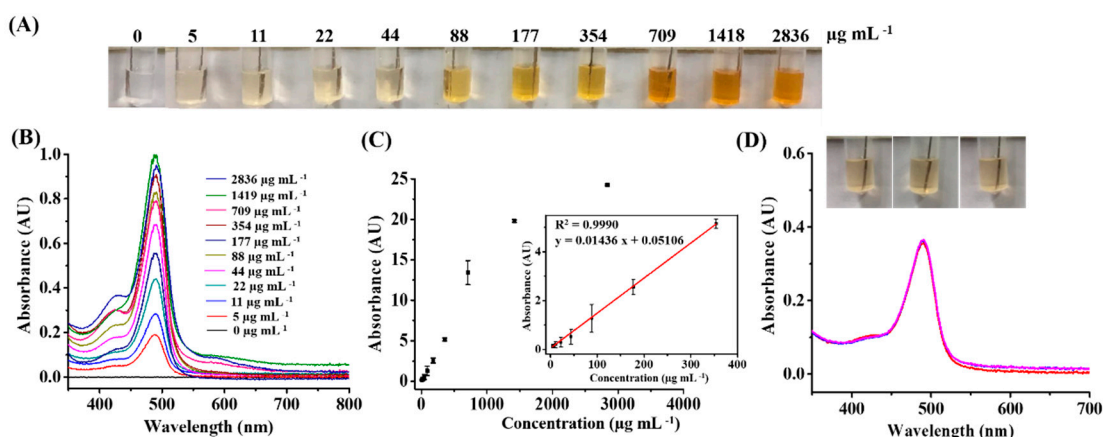

**Figure S3.** (A) Photograph of the samples containing glucose (5–2836  $\mu\text{g mL}^{-1}$ , 0.2 mL) in the presence of 3 gold-coated probes obtained after reaction with sulfuric acid (18.4 M, 0.5 mL) followed by reaction with phenol (5.3 M, 5  $\mu\text{L}$ ) in an ice bath for 5 min and cooling down at room temperature for 10 min. (B) The corresponding UV-Vis absorption spectra of the samples shown in Panel A. (C) Calibration curve obtained by plotting the absorbance at 485 nm versus the concentration of glucose (5–2836  $\mu\text{g mL}^{-1}$ ) according to the results obtained in Panel B and Figure S5. The inset shows the linear dynamic range for the concentration range of glucose from 5 to 354  $\mu\text{g mL}^{-1}$ . (D) UV-Vis absorption spectra the aqueous solution (0.2 mL) inserting with 3 MALCY-probes and reaction with sulfuric acid (18.4 M, 0.5 mL) and phenol (5.3 M, 5  $\mu\text{L}$ ) for 5 min in an ice bath and cooling down at room temperature for 10 min. Three replicates were shown in Panel D. The inset shows the photograph of the resultant sample from three replicates.

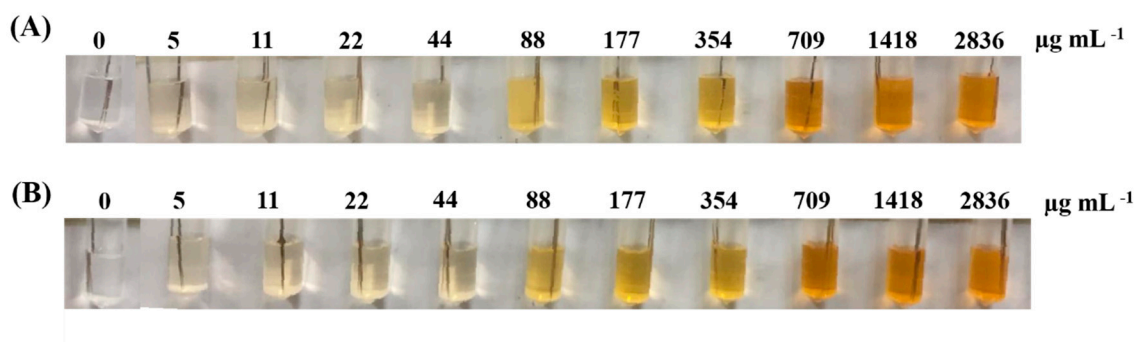

**Figure S4.** (A, B) Two other replicates of the samples as shown in Figure S3A.

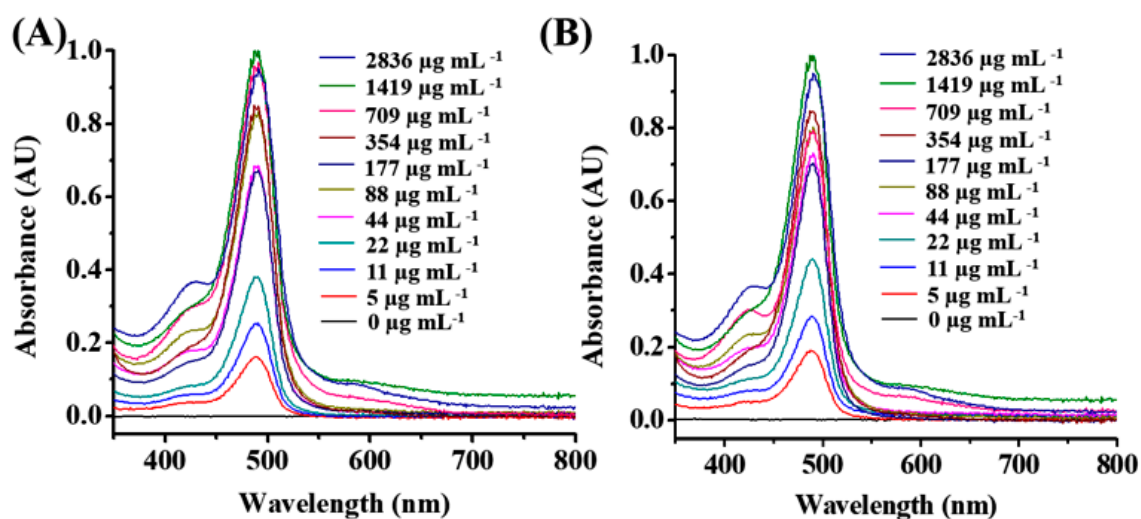

**Figure S5.** Corresponding UV-Vis absorption spectra of the samples shown in (A) Figure S4A and (B) Figure S4B.

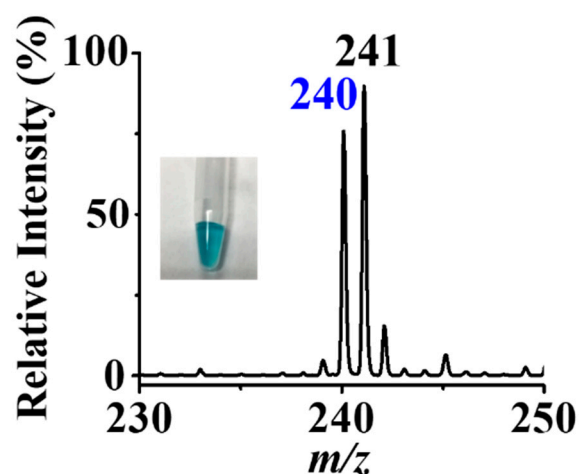

**Figure S6.** C-API mass spectrum of the sample obtained by using HRP to catalyze the peroxidase reaction of the sample containing TMB in the presence of  $\text{H}_2\text{O}_2$ . The resultant reaction sample was 100-fold diluted with ethanol/deionized water (2:1, v/v) prior to C-API-MS analysis. The inset image shows the photograph of the resultant sample obtained after reaction.



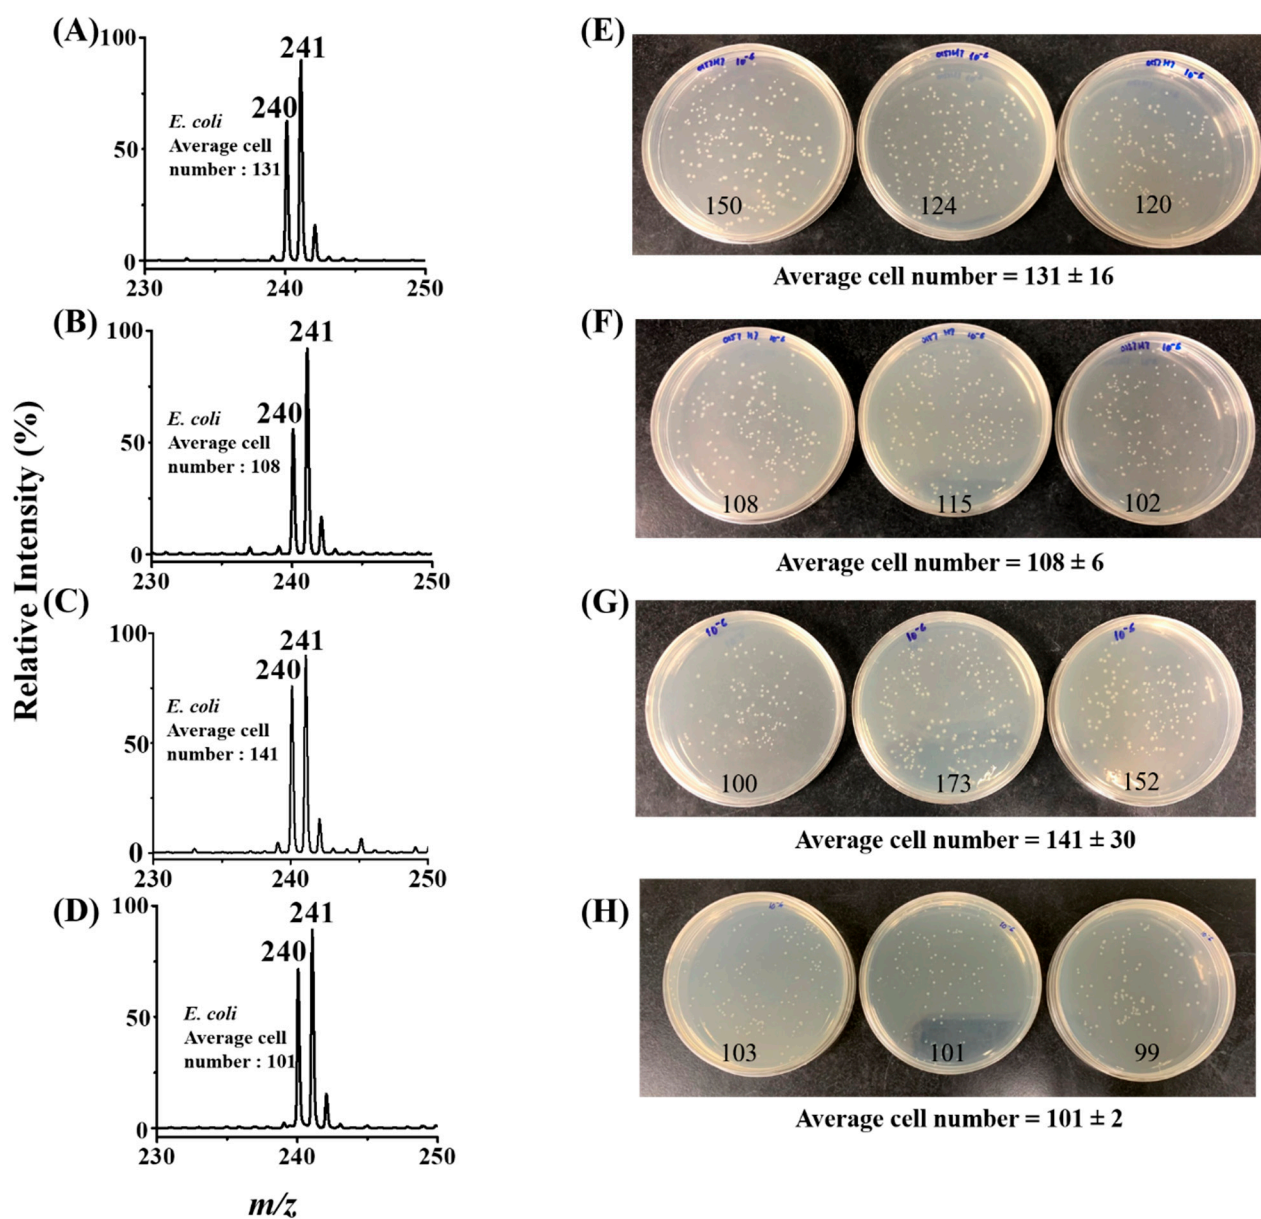

**Figure S7.** (A, B, C, and D) Four replicated experimental results for the sample in Figure 3B. (E, F, G and H) Photographs of the plate counting results derived from samples used to obtain Panels A, B, C and D. The bacterial samples (0.1 mL) were individually cultured on LB agar plate for overnight. Three replicates of overnight culture of each sample were performed for each sample.



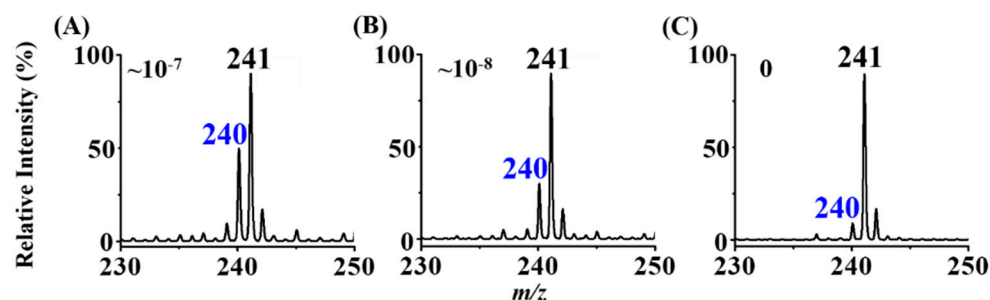

**Figure S8.** C-API mass spectra of the samples obtained by using the MALCY-probes to enrich target species from the samples containing *E. coli* O157:H7 with the concentrations of (A) OD<sub>600</sub> of  $\sim 10^{-7}$ , (B)  $\sim 10^{-8}$ , and (C) 0, followed by releasing the bacteria from the probe for subsequent endogenous peroxidase reactions. The resultant samples were 100-fold diluted with ethanol/deionized water (2:1, v/v) prior to C-API-MS analysis. One droplet (5  $\mu$ L) of the resultant samples were used for C-API-MS analysis.

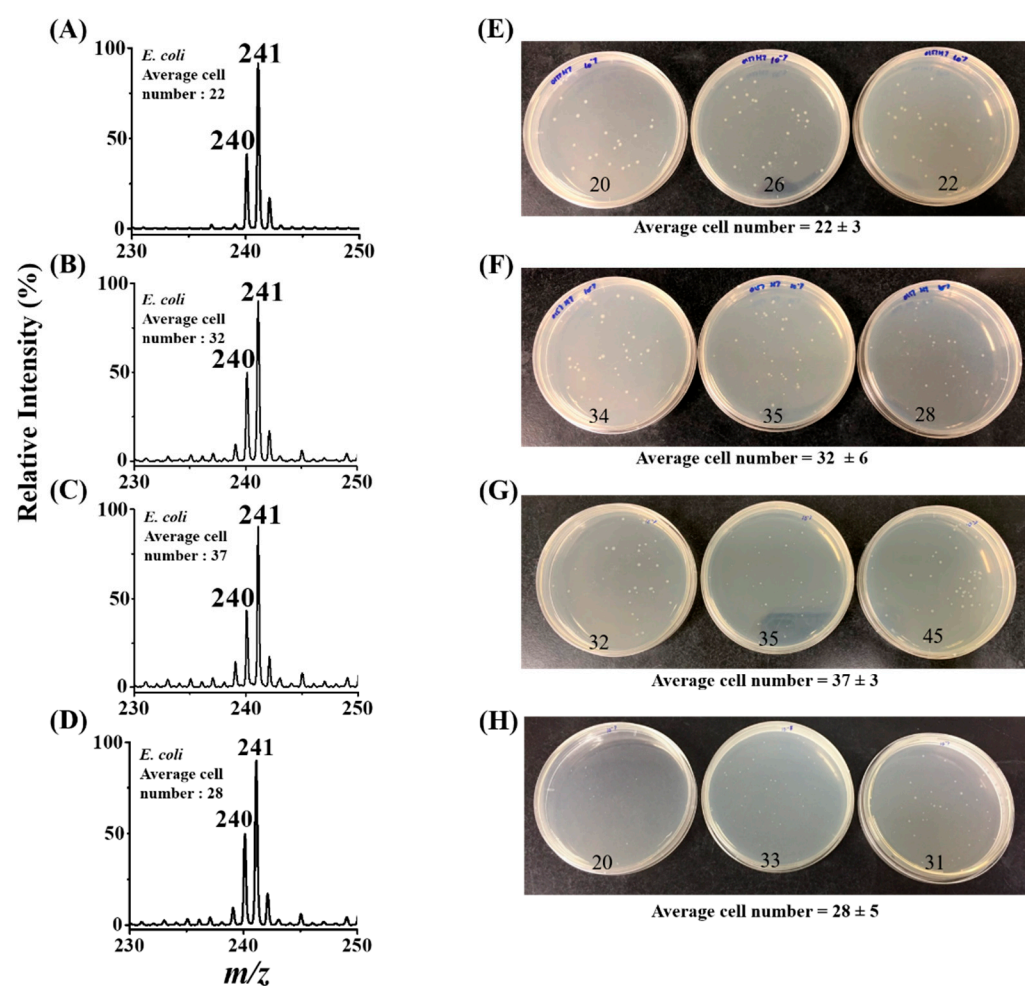

**Figure S9.** (A, B, C, and D) Four replicated experimental results of the sample in Figure S8A. (E, F, G, and H) Photographs of the plate counting results derived from samples used to obtain Panels A, B, C and D. The bacterial samples (0.1 mL) were individually cultured on LB agar plate for overnight. Three replicates of overnight culture of each

sample were performed for each sam

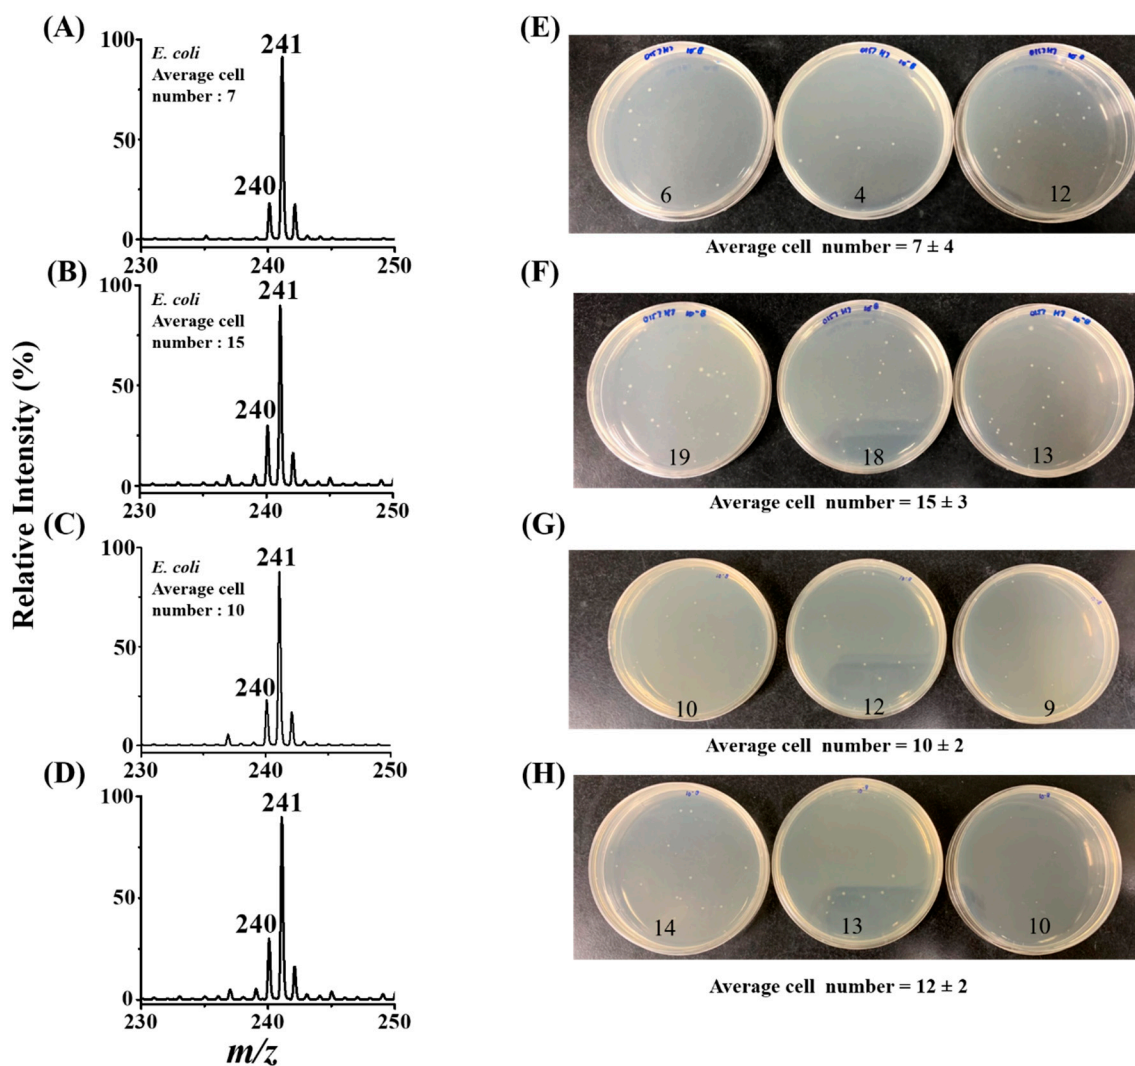

**Figure S10.** (A, B, C, and D) Four replicated experimental results of the sample in **Figure S8B**. (E, F, G and H) Photographs of the plate counting results obtained from overnight culture of the four samples used for obtaining Panels A, B, C, and D. The bacterial samples (0.1 mL) were individually cultured on LB agar plate for overnight. Three replicates of overnight culture of each sample were performed for each sample.

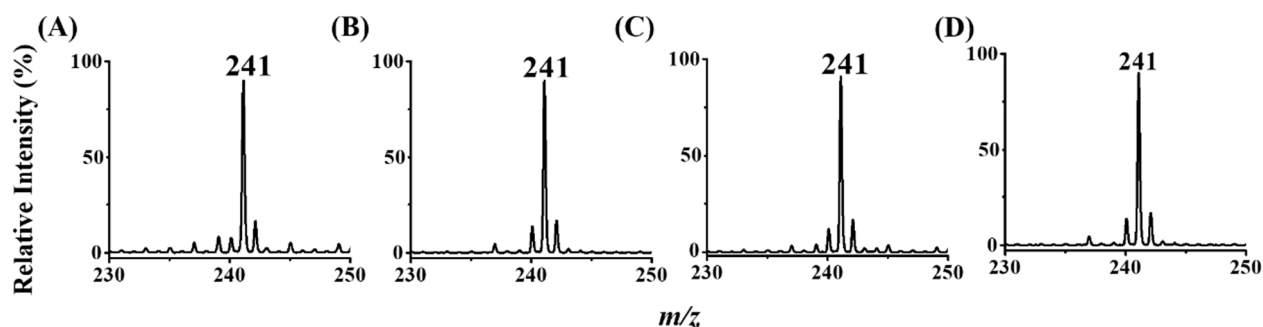

**Figure S11.** (A, B, C, and D) The resultant mass spectra of the blank samples from four replicates.

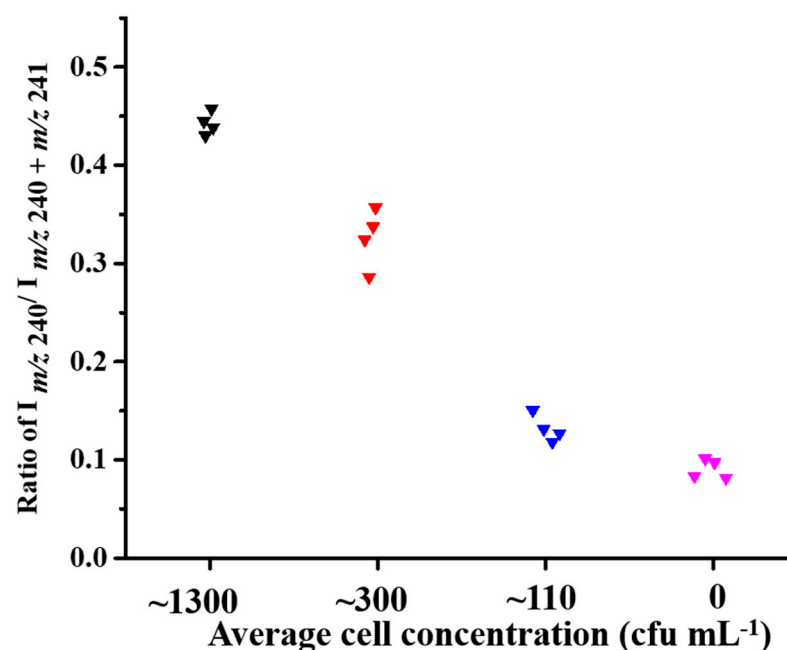

**Figure S12.** Examination of the variations of the ratio of the intensity of the ion peak at  $m/z$  240 to the sum of the ion intensity at  $m/z$  240 and  $m/z$  241 versus the bacterial concentration. The results were obtained from 4 replicates shown in Figures S7 (black triangles), S9 (red triangles), and S10 (blue triangles), and S11 (purple triangles).

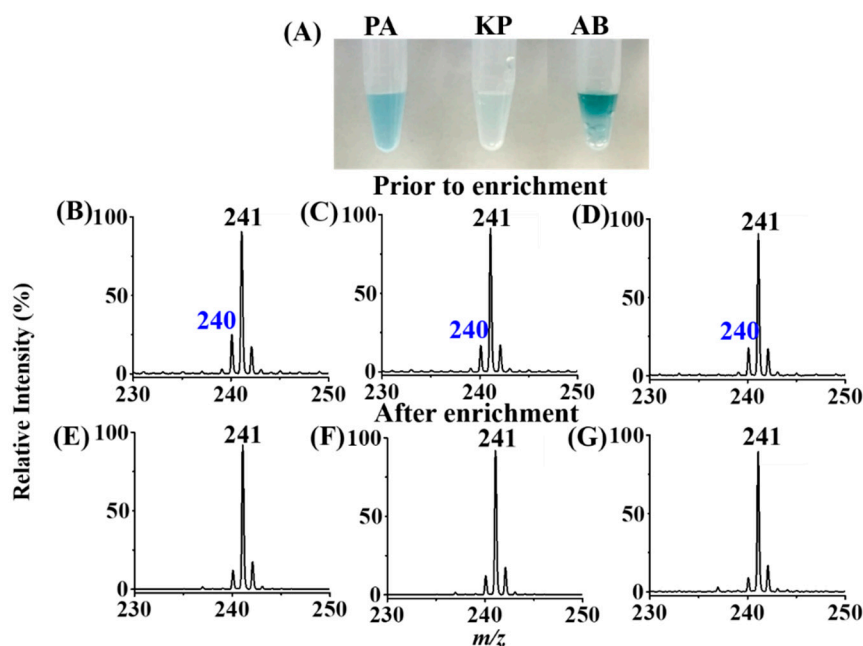

**Figure S13.** (A) Photograph of the samples (0.2 mL) containing *P. aeruginosa* (PA), *K. pneumoniae* (KP), and *A. baumannii* (AB) at the concentrations of OD<sub>600</sub> of ~1 obtained after conducting endogenous peroxidase reaction. C-API mass spectra of the bacterial samples containing (B) *P. aeruginosa*, (C) *K. pneumoniae*, and (D) *A. baumannii* with the concentration of OD<sub>600</sub> of ~10<sup>-5</sup> obtained after bacterial peroxidase reactions prior to enrichment. C-API mass spectra of the samples obtained by using the MALCY-probes to enrich target species from the samples (3 mL) containing (E) *P. aeruginosa*, (F) *K.*

*pneumonia*, and (G) *A. baumannii* with the concentrations of OD<sub>600</sub> of  $\sim 10^{-5}$  followed by releasing the bacteria from the probe and conduction of endogenous peroxidase reactions. The resultant samples were 100-fold diluted with ethanol/deionized water (2:1, v/v) prior to C-API-MS analysis. One droplet (5  $\mu$ L) of the resultant samples were used for MS analysis.

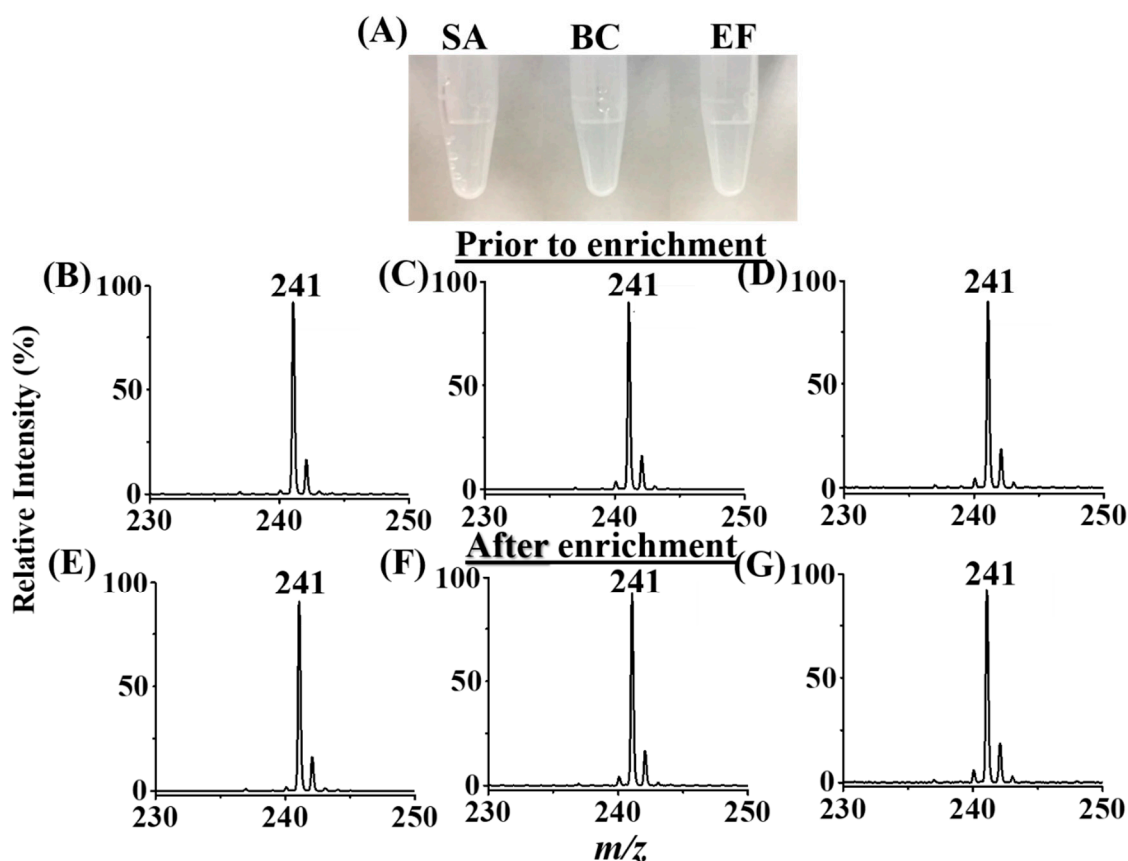

**Figure S14.** (A) Photograph of the bacterial samples (0.2 mL) containing *S. aureus* (SA), *B. cereus* (BC), and *E. faecalis* (EF) with the concentration of OD<sub>600</sub> of  $\sim 1$  prepared in ammonium acetate (10 mM, pH 4.5) with the addition of H<sub>2</sub>O<sub>2</sub> (100 mM, 2  $\mu$ L) and TMB (1 mg mL<sup>-1</sup>, 2  $\mu$ L). C-API mass spectra of the bacterial samples (0.2 mL) with the concentration of OD<sub>600</sub> of  $\sim 10^{-5}$  containing (B) *S. aureus*, (C) *B. cereus*, and (D) *E. faecalis* prepared in ammonium acetate (10 mM) at pH 4.5 with the addition of H<sub>2</sub>O<sub>2</sub> (100 mM, 2  $\mu$ L) and TMB (1 mg mL<sup>-1</sup>, 2  $\mu$ L). C-API mass spectra of the bacterial samples (3 mL) containing (E) *S. aureus*, (F) *B. cereus*, and (G) *E. faecalis* with the concentration of OD<sub>600</sub> of  $\sim 10^{-5}$  prepared in the phosphate buffered saline (PBS) buffer (10 mM, pH 7.5) obtained after enriched by MALCY-probe followed by releasing the bacteria from the probe to the ammonium acetate buffer (pH 4.5, 8  $\mu$ L) followed by the addition of H<sub>2</sub>O<sub>2</sub> (100 mM, 1  $\mu$ L) and TMB (1 mg mL<sup>-1</sup>, 1  $\mu$ L). The samples were incubated for 15 min at room temperature. A droplet of sample (5  $\mu$ L) was used for MS-analysis. All the resultant samples were 100-fold diluted with ethanol/deionized water (2:1, v/v) prior to the C-API-MS analysis.

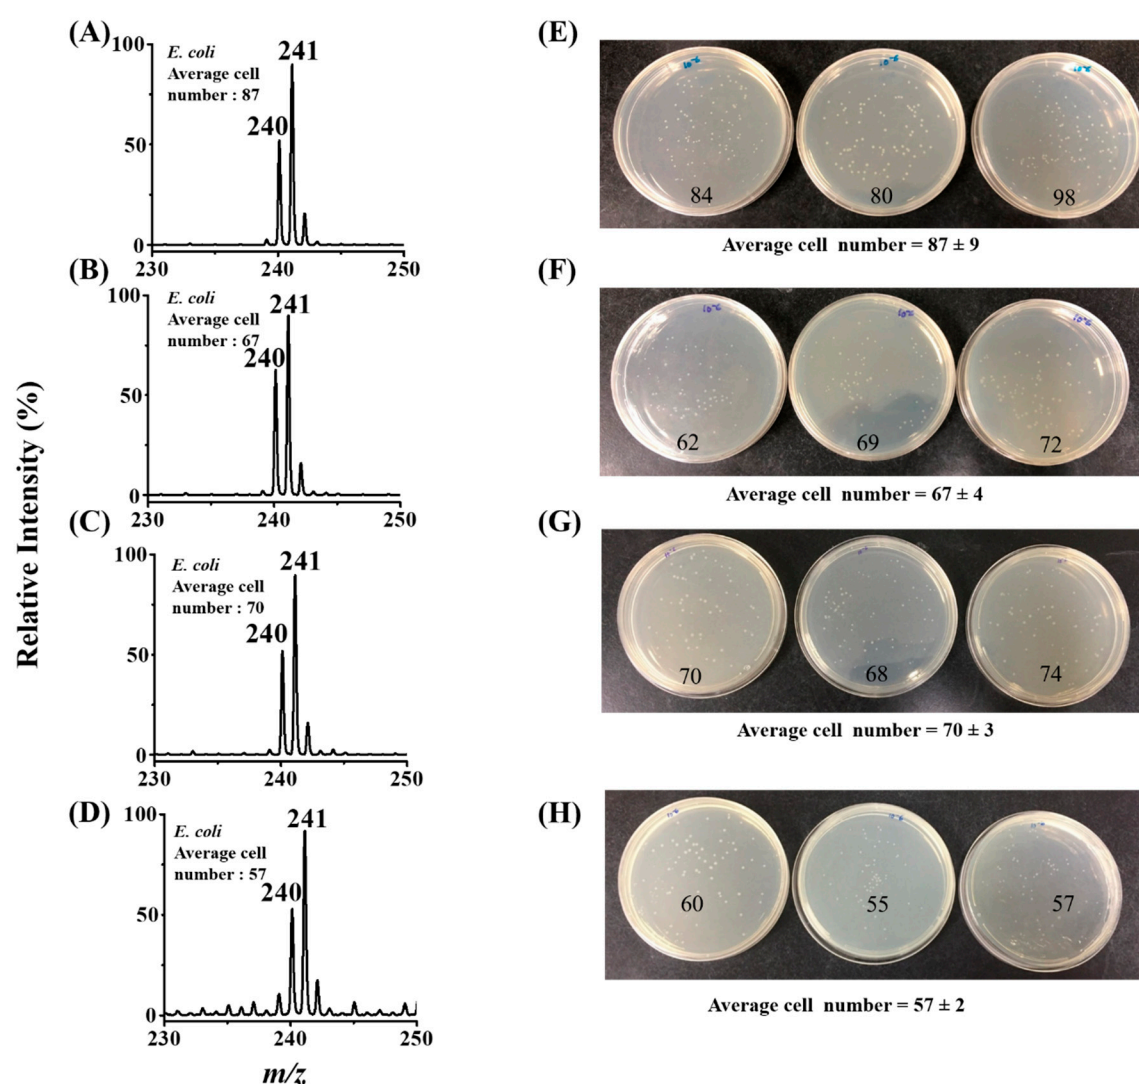

**Figure S15.** (A, B, C, and D) C-API mass spectra of the samples obtained by using the MALCY-probe to trap target species from the orange juice samples (3 mL) spiked with *E. coli* O157:H7 at the concentration  $OD_{600}$  of  $\sim 10^{-6}$  followed by releasing the trapped bacteria in ammonium acetate (pH 4.5, 8  $\mu$ L) under shaking for 15 min and subsequent bacterial peroxidase reaction with the addition  $H_2O_2$  (100 mM, 1  $\mu$ L) and TMB (1 mg  $mL^{-1}$ , 1  $\mu$ L) for another 15 min prior to MS analysis. (E, F, G, and H) Photographs obtained from three replicates of the plate counting results obtained from overnight-culture of the samples used in Panels A, B, C, and D. The bacterial samples (0.1 mL) were individually cultured on LB agar plate for overnight.



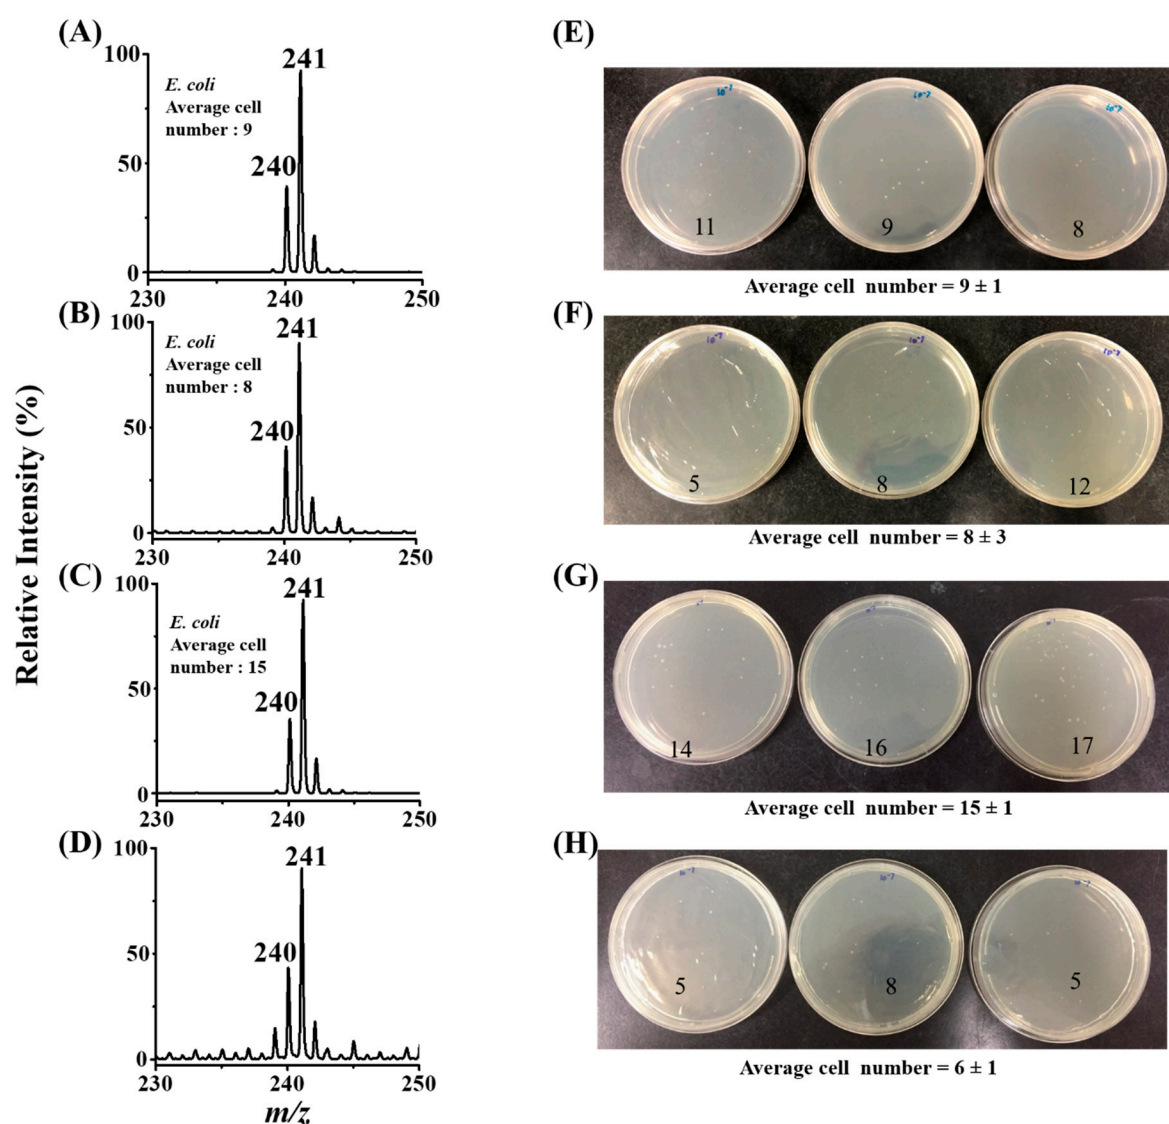

**Figure S16.** (A, B, C and D) C-API mass spectra of the samples obtained by using the MALCY-probe to trap target species from the orange juice samples (3 mL) spiked with *E. coli* O157:H7 at the concentration  $OD_{600}$  of  $\sim 10^{-7}$  followed by releasing the trapped bacteria in ammonium acetate (pH 4.5, 8  $\mu$ L) under shaking for 15 min and subsequent bacterial peroxidase reaction with the addition  $H_2O_2$  (100 mM, 1  $\mu$ L) and TMB (1 mg  $mL^{-1}$ , 1  $\mu$ L) for another 15 min prior to MS analysis. (E, F, G and H) Photographs obtained from three replicates of the plate counting results obtained from overnight-culture of the samples used in Panels A, B, C, and D. The bacterial samples (0.1 mL) were individually cultured on LB agar plate for overnight.



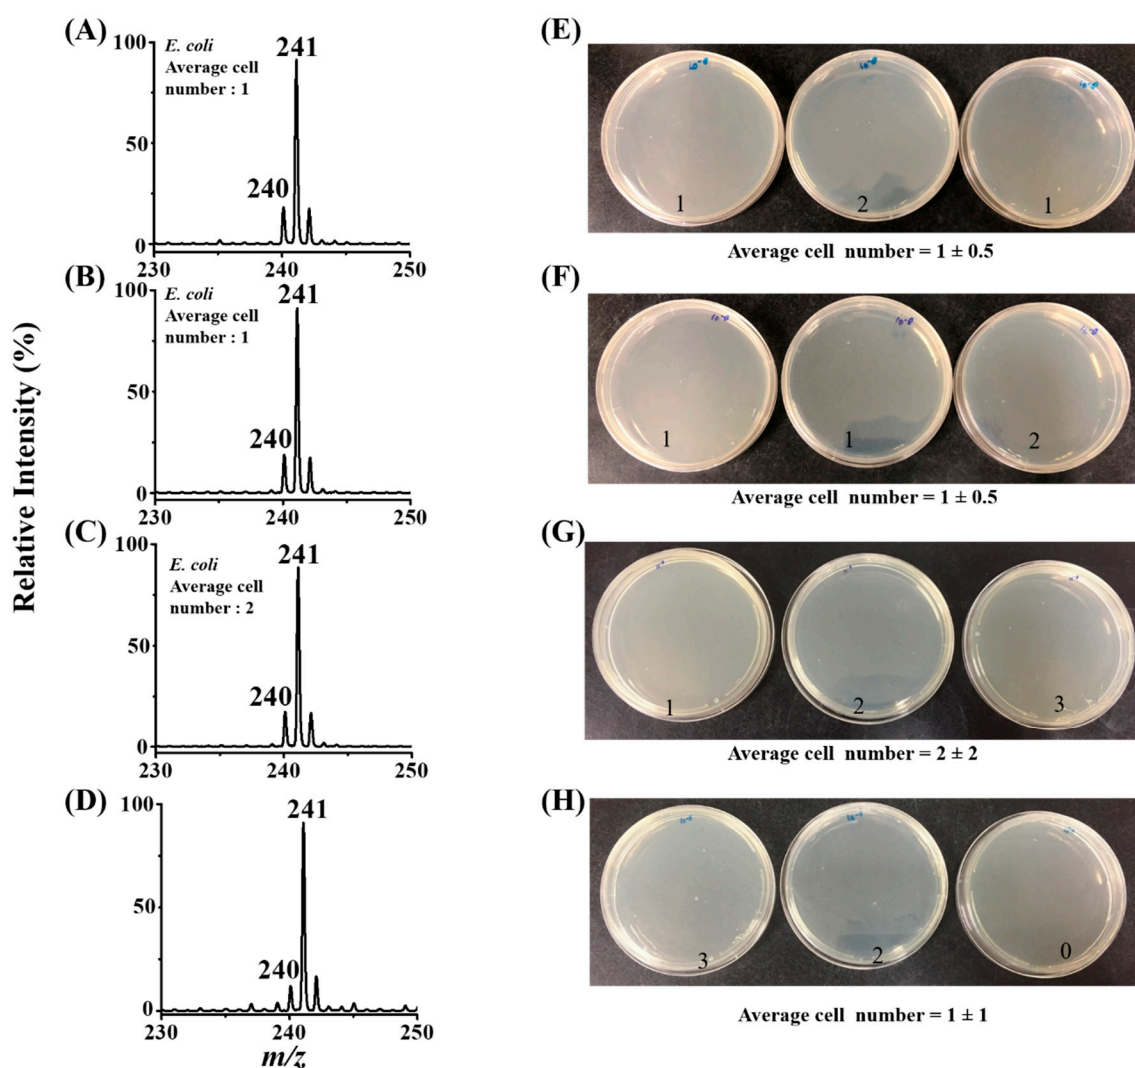

**Figure S17.** (A, B, C, and D) C-API mass spectra of the samples obtained by using the MALCY-probe to trap target species from the orange juice samples (3 mL) spiked with *E. coli* O157:H7 at the concentration  $OD_{600}$  of  $\sim 10^{-8}$  followed by releasing the trapped bacteria in the ammonium acetate buffer (pH 4.5, 8  $\mu$ L) under shaking for 15 min and subsequent bacterial peroxidase reaction with the addition  $H_2O_2$  (100 mM, 1  $\mu$ L) and TMB (1 mg  $mL^{-1}$ , 1  $\mu$ L) for another 15 min prior to MS analysis. (E, F, G and H) Photographs obtained from three replicates of the plate counting results obtained from overnight-culture of the samples used in Panels A, B, C, and D. The bacterial samples (0.1 mL) were individually cultured on LB agar plate for overnight.

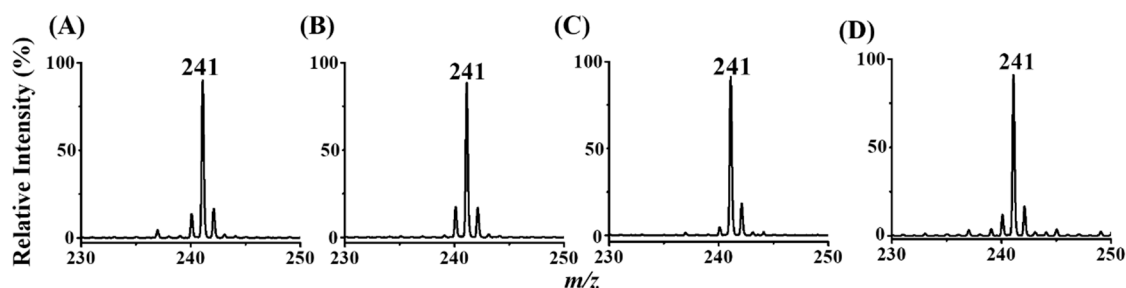

**Figure S18.** (A, B, C, and D) C-API mass spectra of the 4 replicated samples obtained by using the MALCY-probe to trap target species from the orange juice samples (3 mL) without spiked with *E. coli* O157:H7 followed by bacterial peroxidase reaction with the addition  $H_2O_2$  (100 mM, 1  $\mu$ L) and TMB (1 mg  $mL^{-1}$ , 1  $\mu$ L) for another 15 min prior to MS analysis.

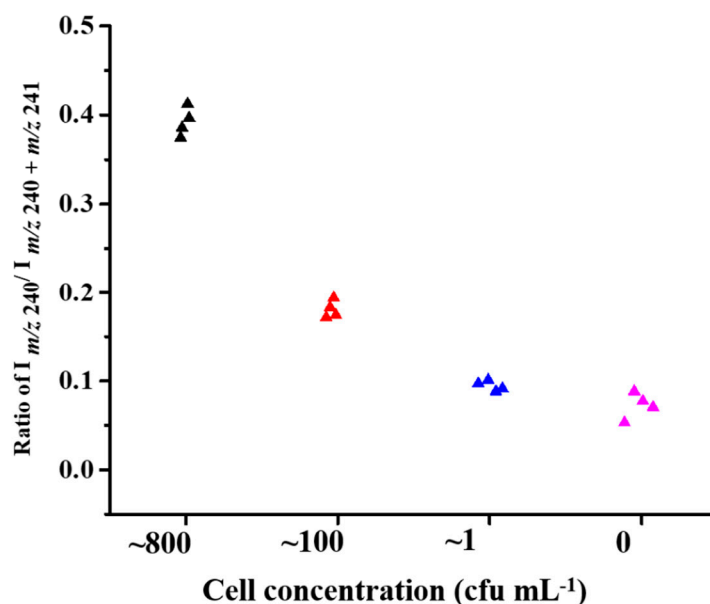

**Figure S19.** Examination of the variations of the ratio of the ion intensity at  $m/z$  240 to the sum of the ion intensity at  $m/z$  240 and 241 versus the bacterial concentration obtained from the results shown in Figure S15 (black triangles), S16 (red triangles), S17 (blue triangles), and S18 (pink triangles).

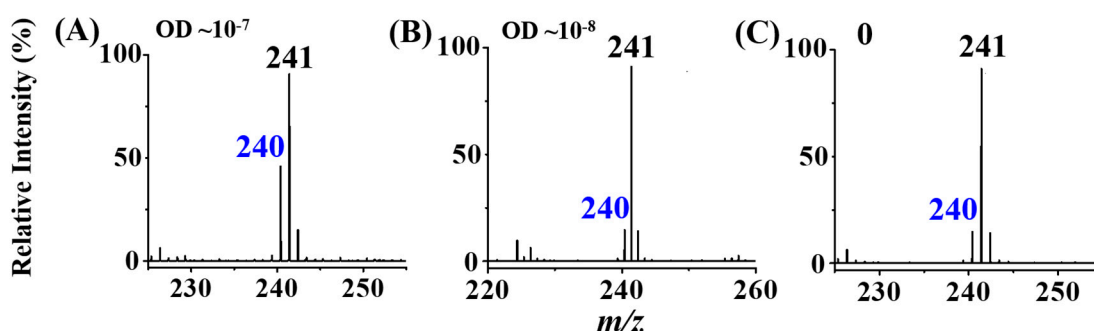

**Figure S20.** C-API mass spectra of the artificial urine samples (3 mL) spiked with *E. coli* J96 at the concentrations of OD<sub>600</sub> of (A) ~10<sup>-7</sup>, (B) ~10<sup>-8</sup>, and (C) 0 prepared in PBS buffer (10 mM, pH 7.5) obtained after enriched by MALCY-probe followed by releasing the bacteria trapped on the probe to ammonium acetate buffer (pH 4.5, 8 µL) under shaking for 15 min, followed by addition H<sub>2</sub>O<sub>2</sub> (100 mM, 1 µL), and TMB (1 mg mL<sup>-1</sup>, 1 µL) and standing for another 15 min prior to MS analysis. The resultant samples were 100-fold diluted with ethanol/deionized water (2:1, v/v) prior to C-API-MS analysis. One droplet of the resultant samples (5 µL) were used for MS analysis.

## References

- [1] B. R. Shmaefsky, Artificial urine for laboratory testing. *Am. Biol. Teach* 57, 7, 428-430. doi:10.2307/4450032
- [2] P. D. Josephy, T. Eling, R. P. Mason, The horseradish peroxidase-catalyzed oxidation of 3,5,3',5'-tetramethylbenzidine. Free radical and charge-transfer complex intermediates. *J. Biol. Chem* 257, 7, 3669-75.
- [3] Z. Fu, S. Rogelj, T. L. Kieft, Rapid detection of *Escherichia coli* O157:H7 by immunomagnetic separation and real-time PCR. *Int. J. Food Microbiol* 99, 1, 47-57.
- [4] P. Daly, T. Collier, S. Doyle, PCR-ELISA detection of *Escherichia coli* in milk. *Lett. Appl. Microbiol* 34, 3, 222-226.
- [5] Y. Zhao, D. Zeng, C. Yan, W. Chen, J. Ren, Y. Jiang, L. Jiang, F. Xue, D. Ji, F. Tang, M. Zhou, J. Dai, Rapid and accurate detection of *Escherichia coli* O157:H7 in beef using microfluidic wax-printed paper-based ELISA. *Analyst* 145, 8, 3106-3115.
- [6] L. Goodridge, J. Chen, M. Griffiths, Development and characterization of a fluorescent-bacteriophage assay for detection of *Escherichia coli* O157:H7. *Appl. Environ. Microbiol* 65, 4, 1397-1404.

- 
- [7] K. H. Shim, M. Kang, M. G. Kim, B. H. Chung, S. S. A. An, Detection of *E. coli* O157:H7 using its endogenous active membrane peroxidase, *J. Toxicol. Environ. Health Sci* 3, 80-85. <https://doi.org/10.1007/s13530-011-0081-6>
- [8] L. Ye, G. Zhao, W. Dou, An electrochemical immunoassay for *Escherichia coli* O157:H7 using double functionalized Au@Pt/SiO<sub>2</sub> nanocomposites and immune magnetic nanoparticles. *Talanta* 182, 354-362. doi: 10.1016/j.talanta.2018.01.095
- [9] M. Ramasamy, D. K. Yi, S. S. A. An, Enhanced detection sensitivity of *Escherichia coli* O157:H7 using surface-modified gold nanorods. *Int. J. Nanomed* 10, 179-190. doi: 10.2147/IJN.S88379
- [10] Y. Zhu, L. Qiao, M. Prudent, A. Bondarenko, N. Gasilova, S. B. Möller, N. Lion, H. Pick, T. Gong, Z. Chen, P. Yang, L. T. Lovey, H. H. Girault, Sensitive and fast identification of bacteria in blood samples by immunoaffinity mass spectrometry for quick BSI diagnosis. *Chem. Sci.* 5, 2987-2995. <https://doi.org/10.1039/C5SC04919A>
